# Supplementary material
Source: MDPI journal article supplement (https://www.mdpi.com/2072-4292/15/3/851)
Supplement: s1 [file s1]

## Supplementary Materials

Table S1. LandTrendr parameters used for temporal segmentation implementation.

| Parameter              | Input value |
|------------------------|-------------|
| maxSegments            | 8           |
| spikeThreshold         | 0.9         |
| vertexCountOvershoot   | 3           |
| preventOneYearRecovery | False       |
| recoveryThreshold      | 1           |
| pvalThreshold          | 0.1         |
| bestModelProportion    | 0.75        |
| minObservationsNeeded  | 6           |

Table S2. Predictor variables derived from each temporal segment for the Random Forest (RF) models.

| Temporal segment | Predictor variable | Spectral index                           | Description                                                                                                   |
|------------------|--------------------|------------------------------------------|---------------------------------------------------------------------------------------------------------------|
| Focal            | Start value        | NBR, TCB, TCG, TCW, TCA, NDVI, EVI, NDMI | Fitted spectral index value for the first year of the segment.                                                |
|                  | End values         | NBR                                      | Fitted spectral index value for the last year of the segment.                                                 |
|                  | Spectral magnitude | NBR, TCB, TCG, TCW, TCA, NDVI, EVI, NDMI | Difference of the fitted spectral index values between the first and last years of the segment.               |
|                  | Duration           | -                                        | Years of the temporal segment.                                                                                |
|                  | DNSR               | NBR                                      | Spectral magnitude divided by root mean square error of fitted and actual values.                             |
|                  | Change rate        | NBR, TCB, TCG, TCW, TCA, NDVI, EVI, NDMI | Spectral magnitude divided by duration.                                                                       |
|                  | Relative change    | NBR, TCB, TCG, TCW, TCA, NDVI, EVI, NDMI | Spectral magnitude divided by start value.                                                                    |
| Pre-/post-       | Start value        | NBR                                      | Fitted spectral index value for the first year of the pre-/post- segments.                                    |
|                  | Spectral magnitude | NBR                                      | Fitted spectral index value for the last year of the pre-/post- segments.                                     |
|                  | Duration           | -                                        | Years of the pre-/post- temporal segments.                                                                    |
|                  | DNSR               | NBR                                      | Spectral magnitude divided by root mean square error of fitted and actual values for the pre-/post- segments. |
|                  | Change rate        | NBR                                      | Spectral magnitude divided by duration for the pre-/post- segments.                                           |

Table S3. Accuracy assessment for Land use/Land cover (LULC) change/forest disturbance classes. Producer's accuracy (PA) and User's accuracy (UA) for each class and overall accuracy (OA) are shown with the 95% confidence intervals.

| Class                               | PA (%)       | UA (%)       | OA (%)      |
|-------------------------------------|--------------|--------------|-------------|
| Cropland                            | 48.9 (±7.4)  | 70.7 (±11.2) | 45.2 (±4.1) |
| Barren                              | 0.1 (±0.1)   | 25.9 (±13.2) |             |
| Forest                              | 94.6 (±3.1)  | 44.5 (±5.7)  |             |
| Grass/Shrub                         | 4.5 (±2.8)   | 17.8 (±11.7) |             |
| Settlement                          | 38.9 (±19.8) | 38.4 (±14.5) |             |
| Water                               | 61.3 (±19.4) | 79.5 (±12.0) |             |
| Others to Forest                    | 19.0 (±10.3) | 20.5 (±11.5) |             |
| Others to Others (excluding forest) | 18.5 (±9.1)  | 24.5 (±11.7) |             |
| Disturbance with forest to forest   | 20.7 (±6.2)  | 48.1 (±14.3) |             |
| Disturbance with forest to others   | 1.6 (±1.5)   | 9.0 (±11.8)  |             |
| Disturbance with others to forest   | 0.3 (±0.2)   | 50.7 (±20.1) |             |

Table S4. Population error matrix for LULC change/forest disturbance classes with area estimates and 95% confidence intervals (CI).

| Classification                         | Reference |        |        |                 |            |        |                     |                     |                                         |                                         |                                         | Area (ha) | (95% CI) |
|----------------------------------------|-----------|--------|--------|-----------------|------------|--------|---------------------|---------------------|-----------------------------------------|-----------------------------------------|-----------------------------------------|-----------|----------|
|                                        | Cropland  | Barren | Forest | Grass/<br>Shrub | Settlement | Water  | Others to<br>Forest | Others to<br>Others | Disturbance<br>with forest<br>to forest | Disturbance<br>with forest<br>to others | Disturbance<br>with others<br>to Forest |           |          |
| Cropland                               | 0.0976    | 0.0000 | 0.0000 | 0.0066          | 0.0071     | 0.0000 | 0.0066              | 0.0179              | 0.0000                                  | 0.0000                                  | 0.0022                                  | 2,430,326 | 337,209  |
| Barren                                 | 0.0000    | 0.0000 | 0.0000 | 0.0000          | 0.0000     | 0.0000 | 0.0000              | 0.0000              | 0.0000                                  | 0.0000                                  | 0.0000                                  | 23,740    | 20,576   |
| Forest                                 | 0.0377    | 0.0000 | 0.2696 | 0.0596          | 0.0000     | 0.0022 | 0.0537              | 0.0144              | 0.1195                                  | 0.0086                                  | 0.0409                                  | 3,470,931 | 436,915  |
| Grass/Shrub                            | 0.0063    | 0.0000 | 0.0009 | 0.0041          | 0.0014     | 0.0000 | 0.0036              | 0.0035              | 0.0022                                  | 0.0005                                  | 0.0005                                  | 1,099,638 | 298,212  |
| Settlement                             | 0.0009    | 0.0013 | 0.0000 | 0.0004          | 0.0078     | 0.0004 | 0.0009              | 0.0082              | 0.0000                                  | 0.0004                                  | 0.0000                                  | 243,779   | 111,058  |
| Water                                  | 0.0003    | 0.0007 | 0.0000 | 0.0000          | 0.0000     | 0.0115 | 0.0007              | 0.0003              | 0.0000                                  | 0.0000                                  | 0.0010                                  | 228,061   | 71,849   |
| Others to Forest                       | 0.0420    | 0.0000 | 0.0058 | 0.0086          | 0.0016     | 0.0000 | 0.0167              | 0.0048              | 0.0016                                  | 0.0000                                  | 0.0001                                  | 1,068,039 | 294,956  |
| Others to Others<br>(excluding forest) | 0.0146    | 0.0000 | 0.0000 | 0.0095          | 0.0022     | 0.0046 | 0.0009              | 0.0112              | 0.0016                                  | 0.0000                                  | 0.0012                                  | 737,614   | 220,264  |
| Disturbance with<br>forest to forest   | 0.0000    | 0.0000 | 0.0086 | 0.0014          | 0.0000     | 0.0000 | 0.0029              | 0.0000              | 0.0327                                  | 0.0058                                  | 0.0165                                  | 1,922,442 | 363,577  |
| Disturbance with<br>forest to others   | 0.0001    | 0.0000 | 0.0000 | 0.0000          | 0.0000     | 0.0000 | 0.0019              | 0.0001              | 0.0001                                  | 0.0002                                  | 0.0004                                  | 189,326   | 122,376  |
| Disturbance with<br>others to Forest   | 0.0001    | 0.0000 | 0.0000 | 0.0000          | 0.0000     | 0.0000 | 0.0000              | 0.0001              | 0.0000                                  | 0.0000                                  | 0.0002                                  | 767,387   | 245,826  |

Table S5. Population error matrix for LULC 1988 classification with area estimates and 95% CI.

| <b>Classification</b> | <b>Reference</b> |        |        |             |            |        | Area (ha) | (95%CI) |
|-----------------------|------------------|--------|--------|-------------|------------|--------|-----------|---------|
|                       | Cropland         | Barren | Forest | Grass/Shrub | Settlement | Water  |           |         |
| Cropland              | 0.1641           | 0.0056 | 0.0050 | 0.0273      | 0.0088     | 0.0060 | 3,382,192 | 376,141 |
| Barren                | 0.0000           | 0.0000 | 0.0000 | 0.0000      | 0.0000     | 0.0000 | 146,463   | 100,371 |
| Forest                | 0.0760           | 0.0022 | 0.4702 | 0.1239      | 0.0000     | 0.0022 | 5,940,172 | 430,606 |
| Grass/Shrub           | 0.0277           | 0.0000 | 0.0111 | 0.0213      | 0.0030     | 0.0009 | 2,201,380 | 396,742 |
| Settlement            | 0.0086           | 0.0026 | 0.0000 | 0.0063      | 0.0082     | 0.0004 | 243,779   | 111,058 |
| Water                 | 0.0012           | 0.0016 | 0.0013 | 0.0018      | 0.0000     | 0.0125 | 267,298   | 88,407  |

Table S6. Population error matrix for LULC 2019 classification with area estimates and 95% CI.

| <b>Classification</b> | <b>Reference</b> |        |        |             |            |        | Area (ha) | (95%CI) |
|-----------------------|------------------|--------|--------|-------------|------------|--------|-----------|---------|
|                       | Cropland         | Barren | Forest | Grass/Shrub | Settlement | Water  |           |         |
| Cropland              | 0.1053           | 0.0022 | 0.0066 | 0.0156      | 0.0208     | 0.0012 | 2,608,872 | 349,171 |
| Barren                | 0.0000           | 0.0000 | 0.0000 | 0.0000      | 0.0004     | 0.0000 | 101,763   | 78,981  |
| Forest                | 0.0908           | 0.0023 | 0.5278 | 0.1218      | 0.0076     | 0.0080 | 6,650,738 | 435,929 |
| Grass/Shrub           | 0.0159           | 0.0000 | 0.0071 | 0.0139      | 0.0027     | 0.0000 | 1,847,761 | 372,250 |
| Settlement            | 0.0018           | 0.0022 | 0.0013 | 0.0004      | 0.0205     | 0.0013 | 634,562   | 183,068 |
| Water                 | 0.0003           | 0.0016 | 0.0016 | 0.0000      | 0.0000     | 0.0168 | 337,587   | 107,086 |

Table S7. Population error matrix for disturbance detection 1988-2019 for the entire study area with area estimates and 95% CI.

| <b>Classification</b> | <b>Reference</b> |                | Area (ha) | (95% CI) |
|-----------------------|------------------|----------------|-----------|----------|
|                       | Disturbance      | No-disturbance |           |          |
| Disturbance           | 0.0560           | 0.0151         | 2,879,155 | 398,270  |
| No-disturbance        | 0.1804           | 0.7486         | 9,302,128 | 398,270  |

Table S8. Accuracy assessment for LULC 2019 classification by Phan et al. (2021) in this study. PA and UA for each class and OA are shown with the 95% confidence intervals.

| <b>Class</b> | <b>PA (%)</b>       | <b>UA (%)</b>       | <b>OA (%)</b>      | <b>Original class</b>            |
|--------------|---------------------|---------------------|--------------------|----------------------------------|
| Cropland     | 67.8 ( $\pm 7.9$ )  | 65.3 ( $\pm 8.3$ )  | 73.4 ( $\pm 3.7$ ) | Cropland, Rice paddies           |
| Barren       | 1.2 ( $\pm 1.2$ )   | 0.5 ( $\pm 0.4$ )   |                    | Barren land                      |
| Forest       | 94.0 ( $\pm 2.8$ )  | 81.7 ( $\pm 4.1$ )  |                    | Forest                           |
| Grass/Shrub  | 29.3 ( $\pm 9.7$ )  | 48.4 ( $\pm 13.7$ ) |                    | Grassland, Scrub land            |
| Settlement   | 27.5 ( $\pm 11.4$ ) | 77.1 ( $\pm 15.3$ ) |                    | Residence                        |
| Water        | 60.6 ( $\pm 17.7$ ) | 89.9 ( $\pm 10.9$ ) |                    | Wetland, Open water, Aquaculture |



Table S9. Area estimates for LULC 1988 and 2019 and area changes 1988–2019.

| Class       | 1988      | 2019      | 1988–2019   |            |
|-------------|-----------|-----------|-------------|------------|
|             | Area (ha) | Area (ha) | Change (ha) | Change (%) |
| Cropland    | 3,382,192 | 2,608,872 | -773,320    | -22.9      |
| Barren      | 146,463   | 101,763   | -44,699     | -30.5      |
| Forest      | 5,940,172 | 6,650,738 | +710,566    | +12.0      |
| Grass/Shrub | 2,201,380 | 1,847,761 | -353,618    | -16.1      |
| Settlement  | 243,779   | 634,562   | +390,783    | +160.3     |
| Water       | 267,298   | 337,587   | +70,289     | +26.3      |
